# Supplementary material for: Genetic Diversity and Population Structure Analysis of the USDA Olive Germplasm Using Genotyping-By-Sequencing (GBS)
Source: MDPI journal article supplement (doi:10.3390/genes12122007), 2021-12-17
Supplement: s1 [file s1]

**Table S1.** Olive accessions with their corresponding USDA plant ID and population groups identified in structure analysis

| ID   | Pop   | Plant ID | Plant name           | Origin    |
|------|-------|----------|----------------------|-----------|
| OL1  | Pop1  | DOLE 125 | Cucca                | Argentina |
| OL10 | Pop3  | DOLE 14  | Mission              | US        |
| OL11 | Pop4  | DOLE 181 | Frantoio             | Albania   |
| OL12 | Admix | DOLE 188 | Oblonga Seedling     | US        |
| OL13 | Pop7  | DOLE 122 | Piconia              | US        |
| OL14 | Pop2  | DOLE 163 | No. 1 Sevillano      | Cyprus    |
| OL15 | Pop3  | DOLE 36  | Toffahi of Egypt     | Egypt     |
| OL16 | Pop3  | DOLE 24  | Sigoise              | Algeria   |
| OL17 | Pop3  | DOLE 84  | Dolce del Marocco    | Morocco   |
| OL18 | Admix | DOLE 34  | Mission              | US        |
| OL19 | Pop1  | DOLE 51  | Columello            | France    |
| OL2  | Admix | DOLE 70  | Cordovil             | Italy     |
| OL20 | Admix | DOLE 26  | Cucca                | Italy     |
| OL21 | Pop4  | DOLE 38  | Columello            | US        |
| OL22 | Admix | DOLE 3   | Oblonga              | France    |
| OL23 | Pop5  | DOLE 174 | Ascolana Dura        | Italy     |
| OL24 | Pop7  | DOLE 50  | Liguria de Catamarca | Chile     |
| OL25 | Pop7  | DOLE 152 | Karolia              | Greece    |
| OL26 | Admix | DOLE 88  | Ascolana Tenera      | US        |
| OL27 | Admix | DOLE 91  | Chetoui              | US        |
| OL28 | Pop7  | DOLE 123 | Campanil             | US        |
| OL29 | Pop3  | DOLE 46  | Mission              | US        |
| OL3  | Admix | DOLE 31  | Dwarf D              | US        |
| OL30 | Pop7  | DOLE 28  | Ascolana Tenera      | Italy     |
| OL31 | Admix | DOLE 54  | Ascolana Dura        | Cyprus    |
| OL32 | Pop7  | DOLE 10  | Ascolana Tenera      | Italy     |
| OL33 | Pop6  | DOLE 106 | Bouquetier           | Italy     |
| OL34 | Pop6  | DOLE 116 | #219                 | US        |
| OL35 | Admix | DOLE 186 | Arbussana            | Spain     |
| OL36 | Pop3  | DOLE 55  | Mission              | Spain     |
| OL37 | Admix | DOLE 13  | Gordal Sevillana     | Spain     |
| OL38 | Admix | DOLE 29  | Oliva de Cerignola   | Greece    |

|      |       |          |                        |           |
|------|-------|----------|------------------------|-----------|
| OL39 | Pop7  | DOLE 80  | Karydolia              | Unknown   |
| OL4  | Admix | DOLE 58  | Manzanilla de Sevilla  | Tunisia   |
| OL40 | Pop5  | DOLE 89  | Chemlali di Stax       | Tunisia   |
| OL41 | Admix | DOLE 73  | Picual                 | Spain     |
| OL42 | Admix | DOLE 101 | 3S5-117                | Unknown   |
| OL43 | Pop7  | Dole 15  | Meski                  | Tunisia   |
| OL44 | Pop3  | DOLE 52  | Manzanilla de Sevilla  | Spain     |
| OL45 | Pop4  | DOLE 76  | Bouteillon             | US        |
| OL46 | Pop7  | DOLE 170 | Rigali                 | Italy     |
| OL47 | Admix | DOLE 183 | Nikitskaya Krupnoplodn | Russia    |
| OL48 | Pop7  | DOLE 118 | Uovo di Piccione       | Italy     |
| OL49 | Pop5  | DOLE 39  | Arbequina              | Spain     |
| OL5  | Admix | DOLE 27  | Leccino                | Italy     |
| OL50 | Admix | DOLE 202 | Cayet Roux             | France    |
| OL51 | Admix | DOLE 108 | Black Italian          | Italy     |
| OL52 | Pop7  | DOLE 83  | Meski                  | Tunisia   |
| OL53 | Admix | DOLE 142 | Lechin de Sevilla      | Spain     |
| OL54 | Pop7  | DOLE 161 | Toffahi of Syria       | Syria     |
| OL55 | Admix | DOLE 86  | Azapa                  | Peru      |
| OL56 | Pop7  | DOLE 23  | Souri                  | Palestine |
| OL57 | Admix | DOLE 214 | Frantoio               | Italy     |
| OL58 | Pop3  | DOLE 140 | Mission                | US        |
| OL59 | Admix | DOLE 162 | Obliza                 | Unknown   |
| OL6  | Admix | DOLE 71  | Redding Picholine      | Italy     |
| OL60 | Pop7  | DOLE 203 | Aglandau               | France    |
| OL61 | Admix | DOLE 19  | San Francesco          | Italy     |
| OL62 | Pop7  | DOLE 185 | Thrombolea             | Greece    |
| OL63 | Pop7  | DOLE 180 | Mixani                 | Albania   |
| OL64 | Pop3  | DOLE 45  | Mission                | Italy     |
| OL65 | Pop3  | DOLE 49  | Manzanilla de Sevilla  | Spain     |
| OL66 | Admix | DOLE 173 | Late Blanquette        | Unknown   |
| OL67 | Admix | DOLE 64  | Lechin de Sevilla      | Spain     |
| OL68 | Pop7  | DOLE 169 | NO. 65A                | Cyprus    |
| OL69 | Pop4  | DOLE 204 | Cailletier             | France    |
| OL7  | Pop7  | DOLE 155 | Prunara                | Italy     |
| OL70 | Pop2  | DOLE 171 | Toffahi of Egypt       | Egypt     |
| OL71 | Pop4  | DOLE 17  | Frantoio               | US        |
| OL72 | Pop6  | DOLE 176 | 880333                 | Pakistan  |

|      |       |          |                          |          |
|------|-------|----------|--------------------------|----------|
| OL73 | Pop3  | DOLE 141 | Manzanilla de Sevilla    | Spain    |
| OL74 | Admix | DOLE 11  | Manzanilla de Sevilla    | Spain    |
| OL75 | Pop7  | DOLE 156 | UC 49-14 (Asoclano X Ba) | Unknown  |
| OL76 | Pop5  | DOLE 111 | Arbequina                | Spain    |
| OL77 | Pop3  | DOLE 99  | Mission                  | US       |
| OL78 | Pop2  | DOLE 145 | Balady                   | Egypt    |
| OL79 | Pop7  | DOLE 68  | Meski                    | Tunisia  |
| OL8  | Admix | DOLE 8   | Azapa                    | Peru     |
| OL80 | Admix | DOLE 143 | Maurino                  | Italy    |
| OL81 | Admix | DOLE 184 | Leccino                  | Italy    |
| OL82 | Admix | DOLE 182 | Nikitskaya #1            | Russia   |
| OL83 | Pop3  | DOLE 77  | Manzanilla de Sevilla    | Spain    |
| OL84 | Admix | DOLE 103 | Verdale                  | Japan    |
| OL85 | Admix | NA       | Tosca                    | Italy    |
| OL86 | Pop5  | NA       | Koroneiki                | Greece   |
| OL87 | Pop5  | NA       | Arbosana                 | Spain    |
| OL88 | Admix | NA       | Pendolino                | Italy    |
| OL89 | Pop4  | NA       | Coratina                 | Italy    |
| OL9  | Pop5  | DOLE 1   | Tragolea                 | Greece   |
| OL90 | Admix | NA       | Hoji Blanca              | Unknown  |
| OL91 | Pop1  | DOLE 189 | Kalamata                 | US       |
| OL92 | Pop7  | DOLE 138 | Grappolo                 | US       |
| OL93 | Pop4  | DOLE 63  | Vassailika               | Italy    |
| OL94 | Pop4  | DOLE 167 | Merhavia                 | Israel   |
| OL95 | Pop7  | DOLE 102 | Verdeal                  | Italy    |
| OL96 | Pop2  | DOLE 129 | Azapa                    | Colombia |

**Table S2.** GBS generated sequencing reads per sample

| <b>Sample ID</b> | <b>Demultiplexed Reads</b> |
|------------------|----------------------------|
| OL1              | 3317866                    |
| OL10             | 3053302                    |
| OL11             | 3033185                    |
| OL12             | 3110072                    |
| OL13             | 2186603                    |
| OL14             | 3269442                    |
| OL15             | 2029644                    |
| OL16             | 1985963                    |
| OL17             | 2237227                    |
| OL18             | 2038640                    |
| OL19             | 2214458                    |
| OL2              | 2609196                    |
| OL20             | 2226781                    |
| OL21             | 2436145                    |
| OL22             | 1215771                    |
| OL23             | 2808998                    |
| OL24             | 2087637                    |
| OL25             | 1511558                    |
| OL26             | 2210748                    |
| OL27             | 2529926                    |
| OL28             | 2592658                    |
| OL29             | 2170077                    |
| OL3              | 2196400                    |
| OL30             | 2632664                    |
| OL31             | 2357842                    |
| OL32             | 2541308                    |
| OL33             | 1613726                    |
| OL34             | 1704443                    |
| OL35             | 3053990                    |
| OL36             | 2285077                    |
| OL37             | 1787461                    |
| OL38             | 2075315                    |
| OL39             | 2305757                    |
| OL4              | 2262265                    |
| OL40             | 2183796                    |
| OL41             | 2395033                    |
| OL42             | 2453127                    |
| OL43             | 1845754                    |
| OL44             | 2577312                    |

|      |          |
|------|----------|
| OL45 | 2756697  |
| OL46 | 2496683  |
| OL47 | 2708100  |
| OL48 | 2741441  |
| OL49 | 2374163  |
| OL5  | 2548155  |
| OL50 | 2217464  |
| OL51 | 2887932  |
| OL52 | 2647649  |
| OL53 | 2845336  |
| OL54 | 3301932  |
| OL55 | 2700558  |
| OL56 | 2049412  |
| OL57 | 2039939  |
| OL58 | 3840527  |
| OL59 | 2187293  |
| OL6  | 3046136  |
| OL60 | 3027538  |
| OL61 | 2610463  |
| OL62 | 206437   |
| OL63 | 1643780  |
| OL64 | 2990926  |
| OL65 | 2682781  |
| OL66 | 7787896  |
| OL67 | 10203610 |
| OL68 | 9021471  |
| OL69 | 8109989  |
| OL7  | 2450816  |
| OL70 | 6383413  |
| OL71 | 9340618  |
| OL72 | 5485789  |
| OL73 | 8591809  |
| OL74 | 8612153  |
| OL75 | 11040211 |
| OL76 | 8522280  |
| OL77 | 7567117  |
| OL78 | 6505804  |
| OL79 | 7074726  |
| OL8  | 3223964  |
| OL80 | 6328315  |
| OL81 | 2403946  |
| OL82 | 8102452  |
| OL83 | 11352205 |

|      |          |
|------|----------|
| OL84 | 9204732  |
| OL85 | 10394819 |
| OL86 | 9259855  |
| OL87 | 9081089  |
| OL88 | 9668377  |
| OL89 | 9476735  |
| OL9  | 3505804  |
| OL90 | 8477952  |
| OL91 | 7851648  |
| OL92 | 10357789 |
| OL93 | 9900149  |
| OL94 | 10283001 |
| OL95 | 6968596  |
| OL96 | 6539299  |

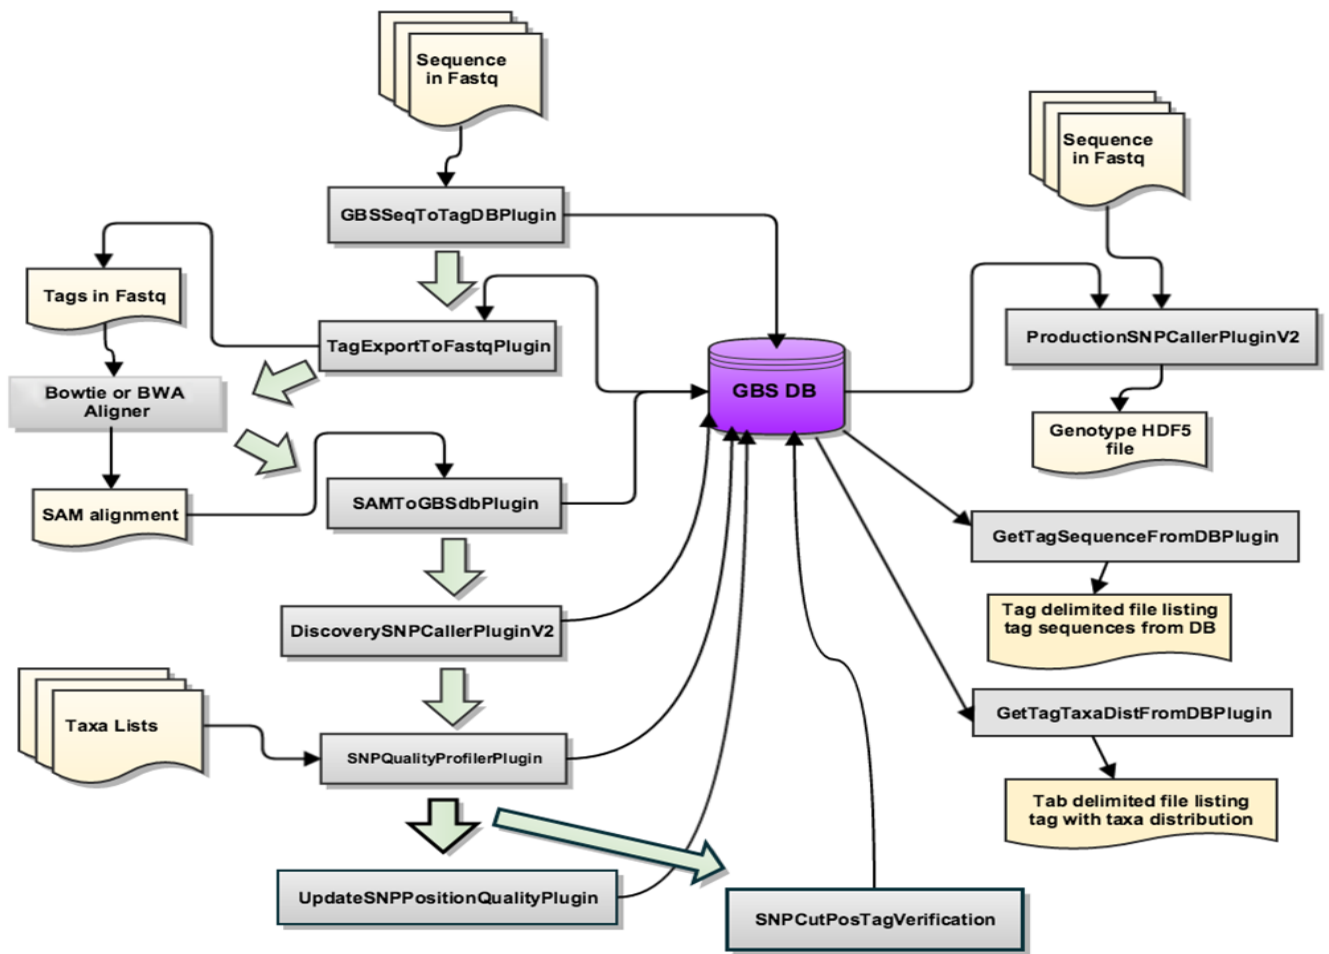

**Figure S1.** Tassel GBS Pipeline Version 2 ([UW Bioinformatics Resource Center Tassel v2 pipeline](http://wisc.edu/bioinformatics/tassel2/)  
[GBS report \(wisc.edu\)](http://wisc.edu/bioinformatics/tassel2/))

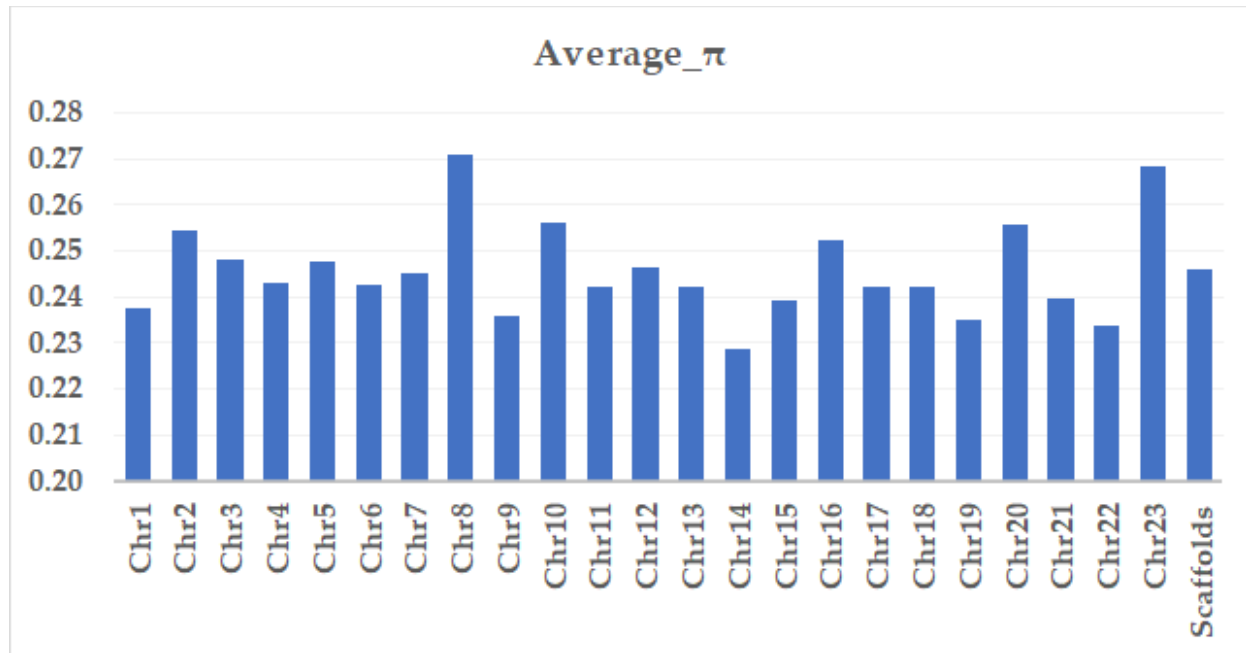

**Figure S2.** Nucleotide diversity per site ( $\pi$ ) for each chromosome and scaffolds.
